# Supplementary material
Source: publisher figshare collection journal article supplement (https://becaris.figshare.com/articles/dataset/_/25594266)

**Supplementary Figure 1.** Markov model diagram.


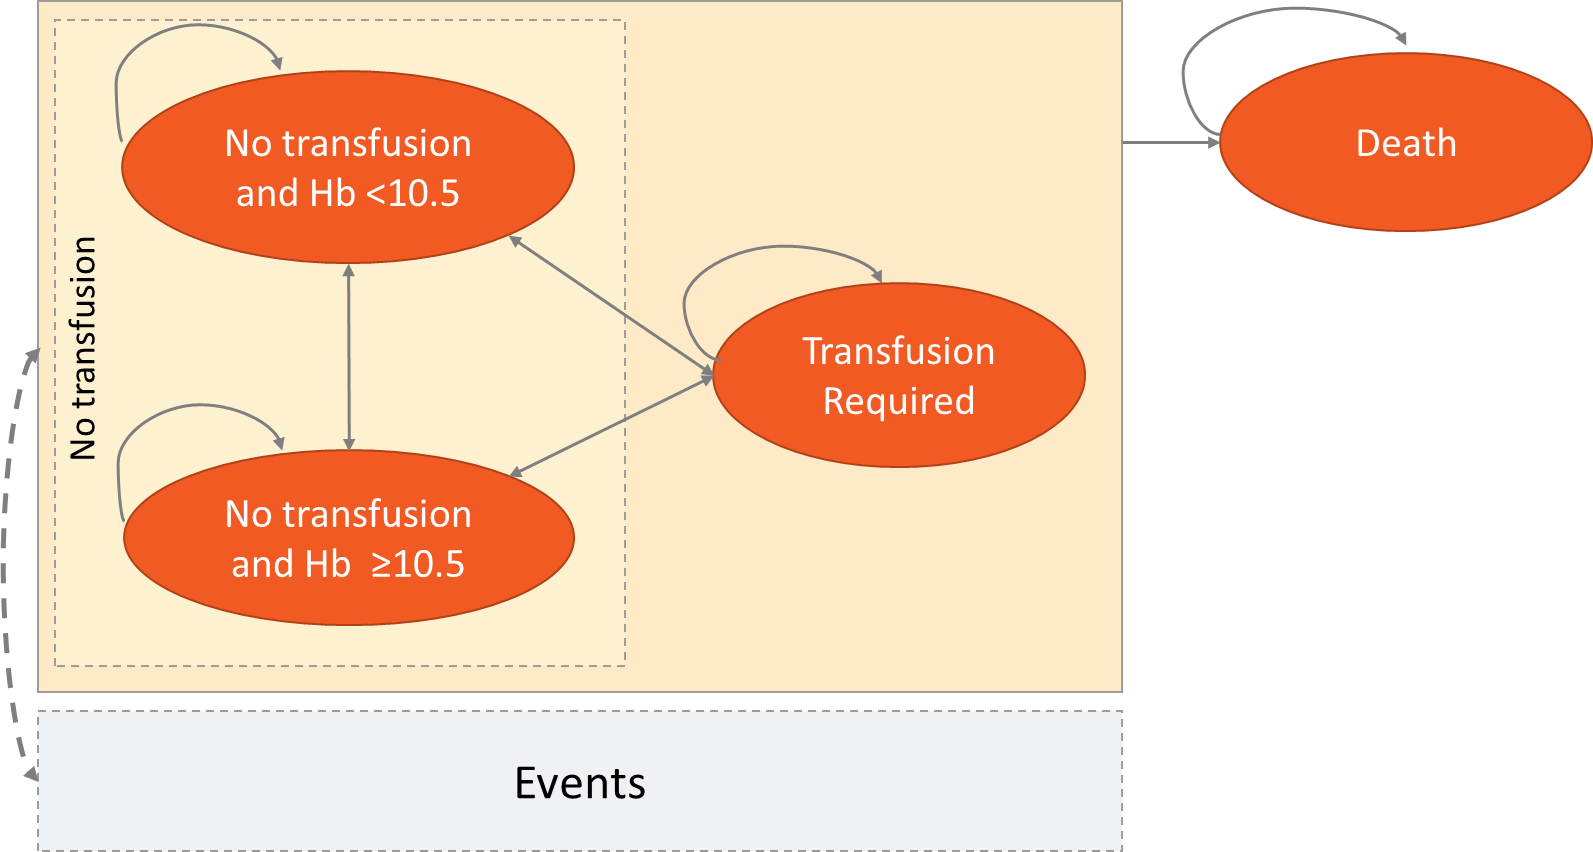


**Transfusion avoidant (Hb <10.5 g/dL)**

**Transfusion avoidant (Hb ≥10.5 g/dL)**

**Dead**

**Transfusion dependent (Hb <10.5 g/dL)**

Hb, (serum) haemoglobin.

**Supplementary Figure 2.** Histogram of EORTC QLQ-C30 subscale scores.
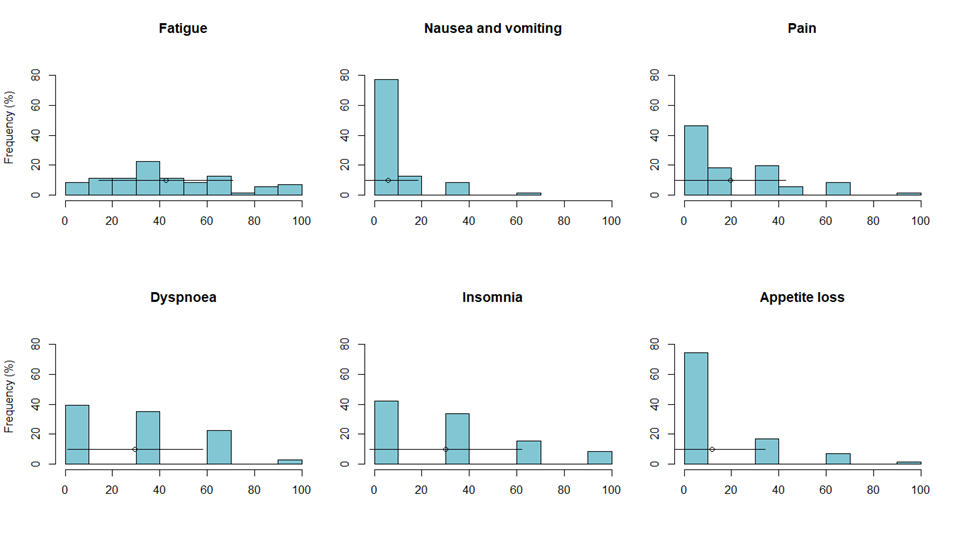

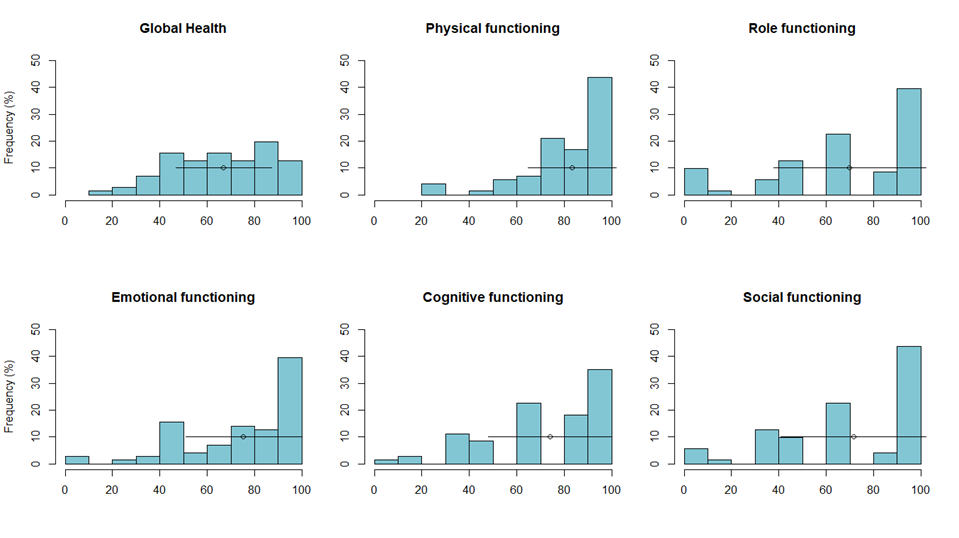

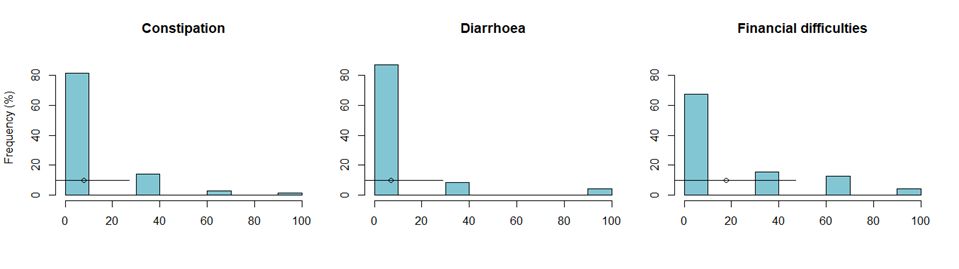


**Supplementary Figure 3.** Histogram of EQ-5D-5L domain scores.


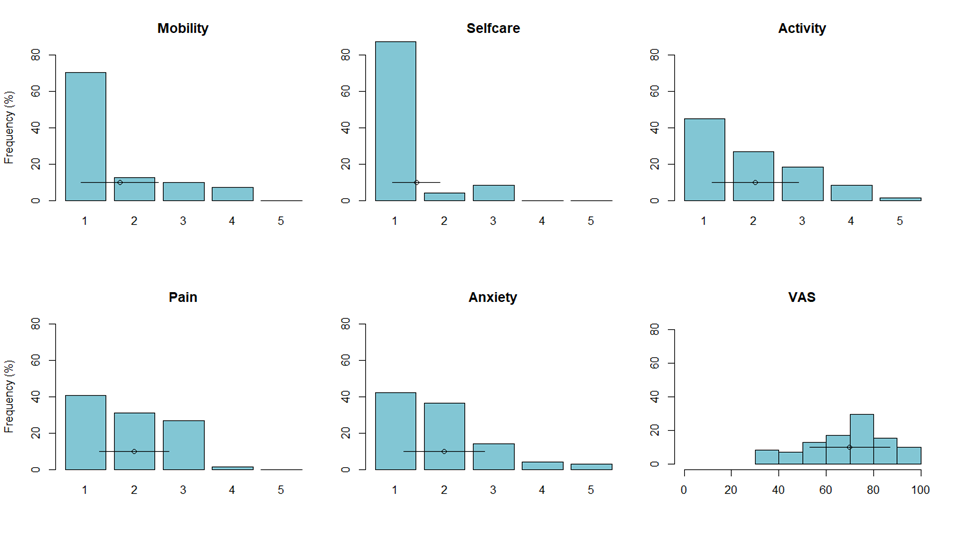


VAS, visual analogue scale.

**Supplementary Figure 4.** Model performance.

1. **Ordinary least squares model**


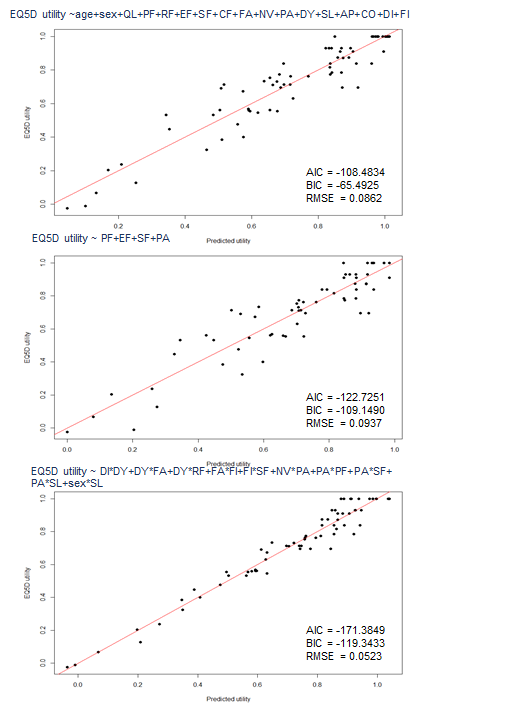


**B) Adjusted limited dependent variable mixture model**


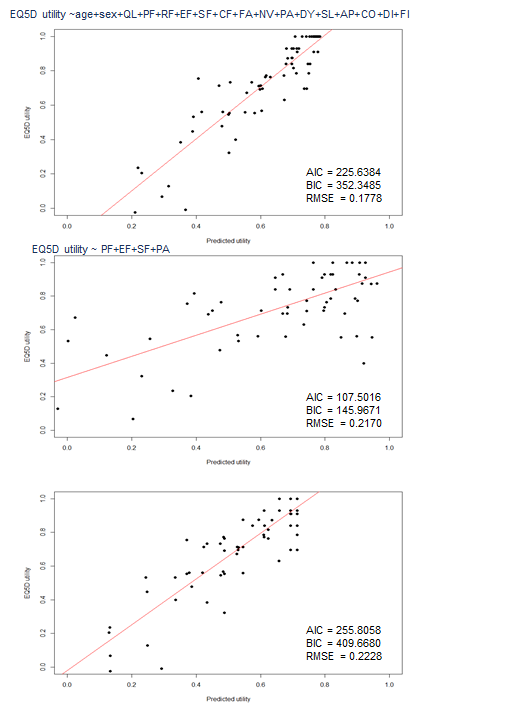


EQ5D utility ~ DI*DY+DY*FA+DY*RF+FA*FI+FI*SF+NV*PA+PA*PF+PA*SF+PA*SL+sex*SL

**C) Beta inflated models**


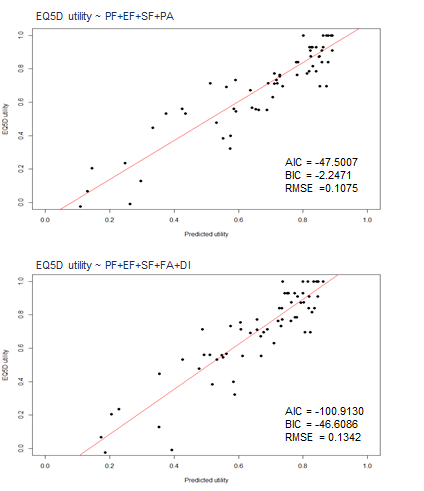


AIC, Akaike information criterion; AP, appetite loss; BIC, Bayesian information criterion; CF, cognitive functioning; CO, constipation; DI, diarrhoea; DY, dyspnoea; EF, emotional functioning; FA, fatigue; FI, financial difficulties; NV, nausea and vomiting; PA, pain; PF, physical functioning; QL, global quality of life; RF, role functioning; RMSE, root-mean-square error; SF, social functioning; SL, insomnia.

**Supplementary Figure 5.** Estimated utilities by visit and treatment.


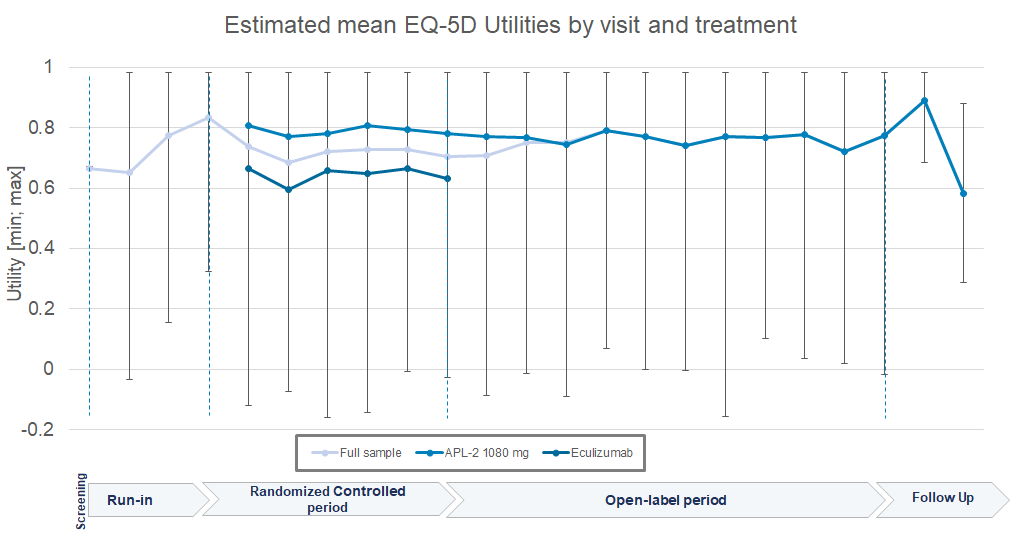

Supplement: Supplementary file 1 [file 1]
